# Supplementary material for: Alterations of Gut Microbiota in Type 2 Diabetes Individuals and the Confounding Effect of Antidiabetic Agents
Source: J Diabetes Res. 2020 Sep 28;2020:7253978. doi: 10.1155/2020/7253978 (PMC7539102; doi:10.1155/2020/7253978)
Supplement: Supplementary 1 — Supplementary file 1: Correlation of age, BMI, and T2DM duration with alpha diversity indices. [file 7253978.f1.xlsx]

## Sheet: Sheet1
			Supplementary file 1: Correlation of age, BMI, T2DM duration with alpha diversity indices
							Spearman correlation							P value
						observed_species	ACE	chao1	simpson	shannon			observed_species	ACE	chao1	simpson	shannon
					Age	0.286	0.338	0.342	-0.097	0.037		Age	0.048	0.018	0.017	0.509	0.802
					BMI	-0.216	-0.238	-0.206	-0.115	-0.164		BMI	0.14	0.102	0.159	0.434	0.263
					T2DM duration	-0.391	-0.314	-0.314	-0.005	-0.19		T2DM duration	0.058	0.134	0.134	0.98	0.372
