# Supplementary material for: Alterations of Gut Microbiota in Type 2 Diabetes Individuals and the Confounding Effect of Antidiabetic Agents
Source: J Diabetes Res. 2020 Sep 28;2020:7253978. doi: 10.1155/2020/7253978 (PMC7539102; doi:10.1155/2020/7253978)
Supplement: Supplementary 2 — Supplementary file 2: Correlation of age and BMI with relatively abundant bacteria at both the phylum and genus levels. [file 7253978.f2.xlsx]

## Sheet: correlation
						Supplementary file 2: Correlation of age and BMI with relatively abundant bacteria at the both phylum and genus level
								Phylum level
		Firmicutes	Bacteroidetes	Proteobacteria	Euryarchaeota	Actinobacteria	Fusobacteria	Elusimicrobia	Tenericutes	Cyanobacteria	Spirochaetes	Verrucomicrobia	Melainabacteria	unidentified_Bacteria	Lentisphaerae	Gracilibacteria	Kiritimatiellaeota	Thaumarchaeota
BMI	Spearman correlation	0.104	-0.054	0.134	-0.247	0.173	-0.042	-0.109	-0.365	0.084	-0.124	0.018	-0.226	-0.112	-0.02	0.126	0.126	-0.219
	p value	0.48	0.715	0.362	0.089	0.238	0.772	0.46	0.01	0.566	0.398	0.903	0.122	0.446	0.887	0.392	0.392	0.134
Age	Spearman correlation	0.26	-0.337	-0.316	0.344	-0.155	0.017	0.054	0.331	-0.076	-0.054	0.151	0.19	-0.001	-0.298	-0.089	0.136	0.196
	p value	0.073	0.019	0.028	0.016	0.29	0.908	0.712	0.021	0.606	0.713	0.304	0.194	0.992	0.039	0.544	0.353	0.179
								Genus level
		Subdoligranulum	Catenibacterium	Bacteroides	Succinivibrio	Methanobrevibacter	Faecalibacterium	Holdemanella	Bifidobacterium	Lactobacillus	Romboutsia	unidentified_Ruminococcaceae	unidentified_Christensenellaceae	unidentified_Lachnospiraceae	Agathobacter	Fusobacterium	unidentified_Clostridiales	Streptococcus	Blautia	Dialister	Roseburia	Elusimicrobium	Enterococcus	Dorea	Alloprevotella	Weissella	unidentified_Cyanobacteria	unidentified_Muribaculaceae	Megasphaera	Parabacteroides	Parvimonas	unidentified_Prevotellaceae	Cetobacterium	unidentified_Erysipelotrichaceae	Solobacterium	Collinsella
BMI	Spearman correlation	0.187	-0.038	-0.187	0.088	-0.245	0.154	0.02	0.19	0.214	0.048	-0.236	-0.13	-0.148	0.051	-0.258	0.208	0.128	-0.07	-0.028	0.036	-0.109	-0.034	0.092	-0.09	0.005	0.084	0.038	0.044	-0.133	-0.202	-0.27	0.129	-0.007	-0.022	0.138
	p value	0.201	0.796	0.201	0.549	0.092	0.293	0.889	0.194	0.144	0.745	0.105	0.377	0.314	0.728	0.076	0.155	0.384	0.635	0.845	0.803	0.46	0.816	0.533	0.541	0.969	0.566	0.793	0.763	0.367	0.167	0.063	0.379	0.96	0.878	0.348
Age	Spearman correlation	-0.095	0.374	-0.306	-0.17	0.339	-0.39	0.246	-0.171	-0.132	-0.199	0.194	0.199	-0.048	-0.139	0.067	-0.136	0.004	-0.019	-0.144	-0.176	0.054	0.336	0.101	0.082	0.026	-0.076	-0.094	-0.158	-0.228	0.035	0.115	0.1	-0.215	0.199	-0.068
	p value	0.516	0.008	0.034	0.246	0.018	0.006	0.091	0.243	0.369	0.174	0.184	0.175	0.742	0.343	0.649	0.354	0.974	0.897	0.326	0.229	0.712	0.019	0.492	0.576	0.856	0.606	0.522	0.281	0.117	0.81	0.433	0.496	0.141	0.174	0.645
